# Supplementary material for: Alterations of the Brain Microstructure and Corresponding Functional Connectivity in Early-Blind Adolescents
Source: Hindawi journal article supplement (doi:10.1155/2019/2747460), 2019-02-24
Supplement: f1 [file 2747460.f1.pdf]

# Neural Plasticity

## Alterations of the brain microstructure and corresponding functional connectivity in early blind adolescents

**Running title: Brain microstructure in EBAs.**

**Zhifeng Zhou<sup>1,2,4</sup>, Jinping Xu<sup>2\*</sup>, Leilei Shi<sup>3</sup>, Xia Liu<sup>1\*</sup>, Fen Hou<sup>4</sup>, Jingyi Zhou<sup>4</sup>, Jinpei Luo<sup>4</sup>, Qingmao Hu<sup>2</sup>, Hengguo Li<sup>4\*</sup>**

<sup>1</sup>Department of Radiology, Shenzhen Mental Health Center, Shenzhen Kangning Hospital, Shenzhen 518003, China.

<sup>2</sup>Institute of Biomedical and Health Engineering, Shenzhen Institutes of Advanced Technology, Chinese Academy of Sciences, Shenzhen 518055, China.

<sup>3</sup>Department of Mechanical Engineering, Sungkyunkwan University, Suwon 16419, South Korea.

<sup>4</sup>Medical Imaging Center, the First Affiliated Hospital of Jinan University, Guangzhou 510630, China.

\*Correspondence should be addressed to Xia Liu; [33342163@qq.com](mailto:33342163@qq.com), Jinping Xu; [jp.xu@siat.ac.cn](mailto:jp.xu@siat.ac.cn) and Hengguo Li; [lhgjnu@263.net](mailto:lhgjnu@263.net)

## Supplementary Materials

**Table SI. Brain regions with significant changes in diffusion tensor imaging metrics between LPs and NLPs.**

| DTI parameters changes | Brain regions                  | Abbreviations | Cluster size | T score | Peak MNI |     |     |
|------------------------|--------------------------------|---------------|--------------|---------|----------|-----|-----|
|                        |                                |               |              |         | x        | y   | z   |
| FA reduction           | Right Fusiform Gyrus           | FG.R          | 80           | -4.95   | 26       | -78 | -12 |
|                        | Right Middle Temporal Gyrus    | MTG.R         | 61           | -4.94   | 66       | -38 | -4  |
|                        | Right Superior Occipital Gyrus | SOG.R         | 112          | -6.48   | 24       | -68 | 32  |
| FA elevation           | Right Superior Frontal Gyrus   | SFG.R         | 107          | 4.32    | 28       | 54  | 18  |
|                        | Right Lingual                  | LING.R        | 50           | 4.43    | 12       | -80 | 0   |
| MD elevation           | Right Temporal Pole Middle     | MTP.R         | 88           | 3.93    | 26       | 12  | -38 |
|                        | Right Fusiform Gyrus           | FG.R          | 97           | 5.38    | 30       | -78 | -16 |
| MD reduction           | Right Caudate                  | CAU.R         | 67           | -3.89   | 20       | -8  | 22  |
|                        | Left Caudate                   | CAU.L         | 106          | -4.15   | -18      | -8  | 26  |
| RD elevation           | Right Temporal Pole Middle     | MTP.R         | 71           | 3.79    | 26       | 12  | -38 |
|                        | Right Fusiform Gyrus           | FG.R          | 108          | 5.24    | 30       | -78 | -16 |
|                        | Right Superior Occipital Gyrus | SOG.R         | 83           | 7.34    | 24       | -72 | 34  |
| RD reduction           | Left Caudate                   | CAU.L         | 89           | -4.45   | -20      | -4  | 26  |
| AD elevation           | Right Temporal Pole Middle     | MTP.R         | 93           | 4.14    | 26       | 12  | -38 |
|                        | Right Fusiform Gyrus           | FG.R          | 83           | 5.41    | 32       | -72 | -16 |
| AD reduction           | Right Caudate                  | CAU.R         | 160          | -4.31   | 18       | -10 | 22  |
|                        | Left Caudate                   | CAU.L         | 87           | -4.47   | -18      | -10 | 26  |

AlphaSim corrected with a voxel-level threshold of  $p < 0.01$  and a cluster-level threshold of  $p < 0.05$ . Abbreviations: LP, early-blind adolescents with light perception; NLP, early-blind adolescents without light perception; FA, fractional anisotropy; MD, mean diffusivity; RD, radial diffusivity; AD, axial diffusivity; and MNI, Montreal Neurological Institute.

**Table SII. Brain regions with significant changes of RSFC between LP and NLP group.**

| ROI seeds | Brain regions                | Abbreviations | Cluster size (voxels) | T score | Peak MNI |     |     |
|-----------|------------------------------|---------------|-----------------------|---------|----------|-----|-----|
|           |                              |               |                       |         | x        | y   | z   |
| FG.R      | Right superior frontal gyrus | SFG.R         | 93                    | 6.14    | 15       | 39  | -15 |
|           | Right middle temporal        | MTG.R         | 89                    | 5.41    | 63       | -51 | -6  |
| SFG.R     | Left inferior temporal gyrus | ITG.L         | 48                    | -4.47   | -39      | -45 | -12 |
|           | Right postcentral gyrus      | PCG.R         | 36                    | -3.98   | 30       | -27 | 48  |

AlphaSim corrected with a voxel-level threshold of  $p < 0.01$  and a cluster-level threshold of  $p < 0.05$ . Abbreviations: RSFC, resting-state functional connectivity; LP, early blind adolescents with light perception; NLP, early blind adolescents without light perception; ROI, region of interest; FG.R, right fusiform gyrus; SFG.R, right superior frontal gyrus; and MNI, Montreal Neurological Institute.

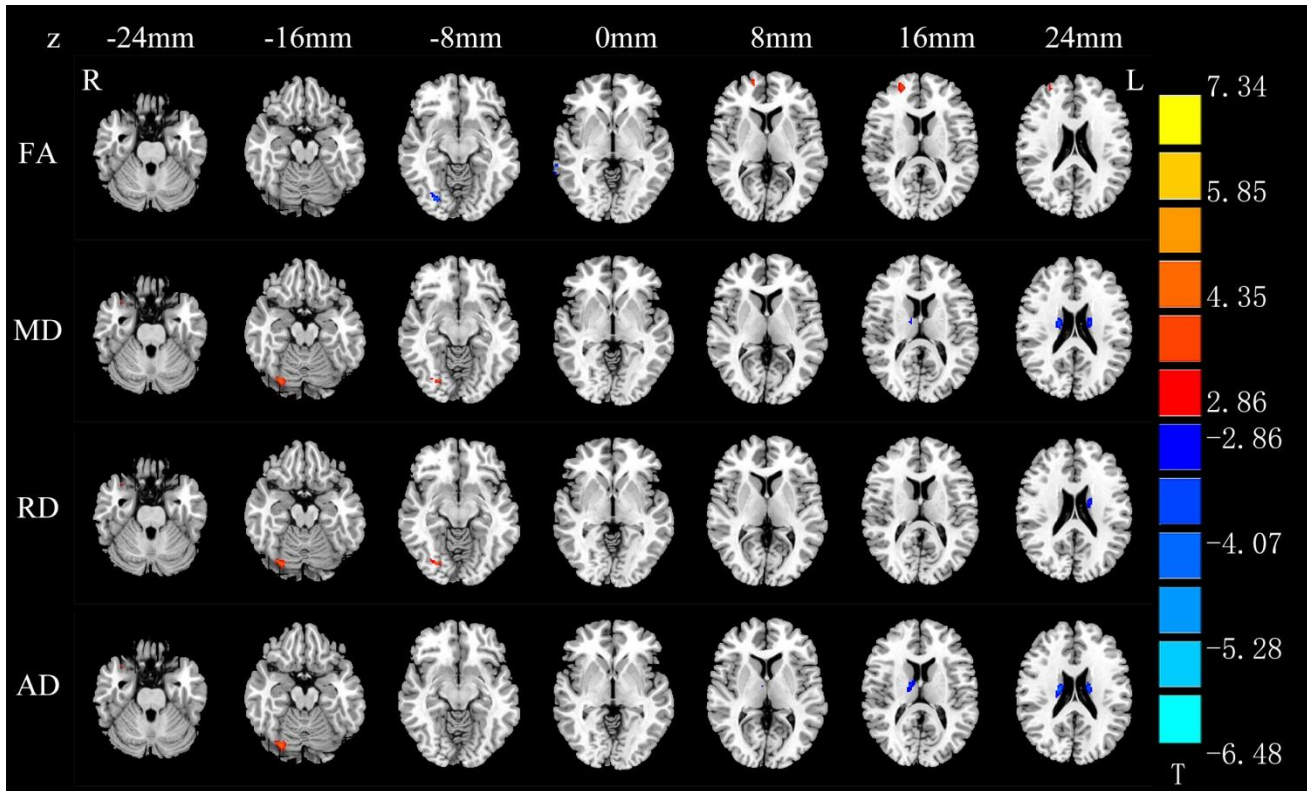

**Figure SI:** Group differences of fractional anisotropy (FA), mean diffusivity (MD), radial diffusivity (RD) and axial diffusivity (AD) using voxel-based analyses in LPs compared to NLPs (AlphaSim corrected with a voxel-level threshold of  $p < 0.01$  and a cluster-level threshold of  $p < 0.05$ ). Blue and red regions denote decreased and increased DTI parameters, respectively. The numbers at the top indicate the z value of MNI coordinates.

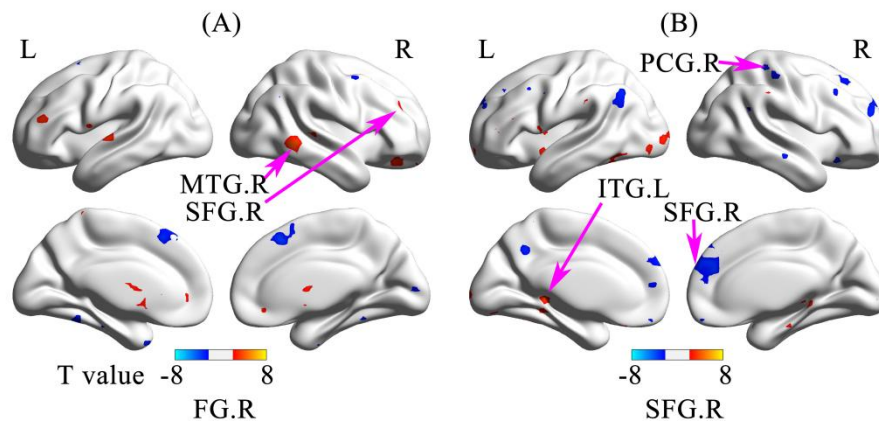

**Figure SII:** Brain regions that showed altered functional connectivity with FG.R (A) and SFG.R (B), respectively, in LPs compared to NLPs. Two sample  $t$ -tests were performed to explore the intergroup differences. The results were corrected by AlphaSim method at a voxel level of  $p < 0.01$ . All abbreviations of brain regions are shown in **Table SI-II**.

## References
